# Supplementary material
Source: publisher figshare collection journal article supplement (https://karger.figshare.com/articles/dataset/_/7649468)
Supplement: Supplementary file 1 [file 1]

## Supplement

**Table S2. Changes in biochemical and PD-related parameters over one year  
between diabetic and non-diabetic patients**

| Parameters                         | Diabetic patients<br>n = 59 | Non-diabetic patients<br>n = 137 | <i>P</i> value * |
|------------------------------------|-----------------------------|----------------------------------|------------------|
| ΔHb (g/dL)                         | -0.24±1.68                  | -0.14±1.80                       | 0.700            |
| ΔAlb (g/dL)                        | 0.14±0.45                   | 0.06±0.36                        | 0.265            |
| ΔBUN (mg/dL)                       | -19.00 (-77.98-2.00)        | -12.00 (-75.85-3.25)             | 0.574            |
| ΔCr (mg/dL)                        | 0.87±2.02                   | 0.71±2.21                        | 0.638            |
| ΔK (meq/L)                         | -0.10±0.91                  | -0.16±0.75                       | 0.659            |
| ΔNa (meq/L)                        | -2.03±3.73                  | -1.78±3.26                       | 0.650            |
| ΔCa (mg/dL)                        | 0.26±1.05                   | 0.25±0.89                        | 0.955            |
| ΔP (mg/dL)                         | 0.14±1.64                   | 0.06±1.44                        | 0.747            |
| ΔTC (mg/dL)                        | 1.50 (-26.03-36.25)         | -7.73 (-29.50-12.00)             | 0.083            |
| ΔKt/V                              | -0.01±0.40                  | -0.06±0.45                       | 0.474            |
| ΔWCcr (ml/min/1.73m <sup>2</sup> ) | -6.04 (-15.72-6.23)         | -2.30 (-10.34-5.20)              | 0.572            |
| ΔnPCR (g/day)                      | 0.01±0.17                   | -0.01±0.21                       | 0.666            |
| ΔUrine volume (mL/day)             | -150.0 (-500.0-75.0)        | -145.0 (-400.0-30.0)             | 0.719            |

\* Independent Sample Test or Mann-Whitney U test (ΔBUN, ΔTC, ΔWCcr and ΔUrine volume) as appropriate.

“Δ” prior to the parameter denotes the value of change over one year.
